# Supplementary material for: A crayfish molar tooth protein with putative mineralized exoskeletal chitinous matrix c properties
Source: Oxford University Press journal article supplement (doi:10.1242/jeb.123539), 2015-01-01
Supplement: jeb123539supp.pdf [file jeb123539supp.pdf]

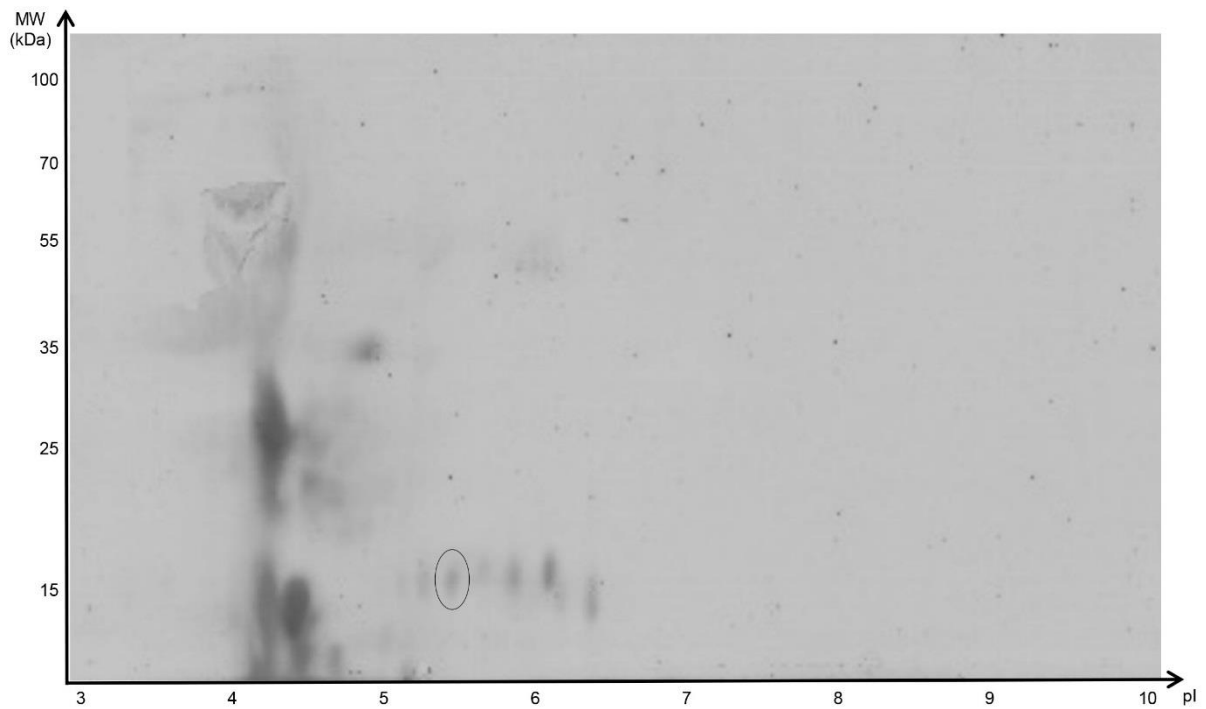

**Fig. S1.** Two-dimensional electrophoresis of *C. quadricarinatus* molar proteins. Proteins were separated on a linear 3–10 pH gradient and then on 15% polyacrylamide gel stained with mass compatible Coomassie blue. Cq-M15 was identified in the spot of ~17 kDa /pI ~5.5 (The spot is marked by a circle).
